# Supplementary material for: Replacement of native by non-native animal communities assisted by human introduction and management on Isla Victoria, Nahuel Huapi National Park
Source: PeerJ. 2015 Oct 20;3:e1328. doi: 10.7717/peerj.1328 (PMC4662593; doi:10.7717/peerj.1328)
Supplement: Supplemental Information 3 — Dataset showing data on distance sampling for vertebrate species on Isla Victoria. Each row is an animal detection. Columns describe the transect sampled, the species detected, the type of environment, the transect length, the number of individuals (group size) and the perpendicular distance of the animal to the linear transect. [file peerj-03-1328-s003.xls]

## Sheet: Hoja1
Transect	Species	Environment	Effort	Nind	Distance
P1P2	faisan	Plantation	500	2	22.5
P1P2	faisan	Plantation	500	2	30.6
P1P2	ciervo	Plantation	500	2	17.7
S3S4	faisan	Shrubland	500	1	7.5
S3S4	faisan	Shrubland	500	1	6.1
S5S6	ciervo	Shrubland	500	3	20
S5S6	ciervo	Shrubland	500	1	15
P3P4	none	Plantation	500	NA	NA
N3N4	ciervo	Forest	500	1	70
PuertoPampa	ciervo	Plantation	500	1	0
N5N6	ciervo	Forest	500	1	150
S1S2	faisan	Shrubland	500	2	4
S3S4	none	Shrubland	500	NA	NA
S5S6	ciervo	Shrubland	500	1	70
P1P2	none	Plantation	500	NA	NA
antepuerto	none	Forest	500	NA	NA
P1P2	fio	Plantation	500	1	0
P1P2	fio	Plantation	500	1	3.8
P1P2	faisan	Plantation	500	2	0
P1P2	zorzal	Plantation	500	1	3.5
P1P2	fio	Plantation	500	1	28.3
P1P2	paloma	Plantation	500	1	2
P1P2	fio	Plantation	500	3	6.9
P1P2	zorzal	Plantation	500	1	8.6
P1P2	fio	Plantation	500	1	2
P1P2	fio	Plantation	500	4	12.9
P1P2	zorzal	Plantation	500	1	20
P1P2	chingolo	Plantation	500	1	1
P1P2	fio	Plantation	500	4	10.3
P1P2	fio	Plantation	500	1	3.1
P1P2	fio	Plantation	500	2	2
P1P2	fio	Plantation	500	5	1
S1S2	zorzal	Shrubland	500	2	8
S1S2	cabecitanegra	Shrubland	500	5	16.1
S1S2	fio	Shrubland	500	2	19.7
S1S2	fio	Shrubland	500	1	5
S1S2	cabecitanegra	Shrubland	500	10	9.4
S1S2	peutren	Shrubland	500	2	10
S1S2	fio	Shrubland	500	1	2
S1S2	comesebo	Shrubland	500	2	1
S1S2	faisan	Shrubland	500	1	1
S1S2	comesebo	Shrubland	500	1	1
S1S2	comesebo	Shrubland	500	2	6.1
S1S2	cabecitanegra	Shrubland	500	2	0
P3P4	fio	Plantation	500	1	19.7
P3P4	peutren	Plantation	500	1	6
P3P4	fio	Plantation	500	1	17.2
P3P4	zorzal	Plantation	500	1	25
P3P4	comesebo	Plantation	500	2	18
P3P4	zorzal	Plantation	500	1	14.8
P3P4	faisan	Plantation	500	1	27.2
P3P4	faisan	Plantation	500	1	18
P3P4	faisan	Plantation	500	1	15
P3P4	faisan	Plantation	500	2	2
P3P4	cabecitanegra	Plantation	500	1	17.2
P3P4	fio	Plantation	500	2	17
N1N2	zorzal	Forest	500	1	1
N1N2	fio	Forest	500	2	3.1
N1N2	faisan	Forest	500	1	0
N1N2	zorzal	Forest	500	1	0
N1N2	faisan	Forest	500	2	0
N1N2	faisan	Forest	500	1	0
N1N2	zorzal	Forest	500	1	1
N1N2	chingolo	Forest	500	1	15
N1N2	faisan	Forest	500	1	2
N1N2	fio	Forest	500	2	5
N1N2	ciervo	Forest	500	1	3
N3N4	fio	Forest	500	3	10
N3N4	fio	Forest	500	1	25
N3N4	fio	Forest	500	1	15
N3N4	zorzal	Forest	500	1	23.5
N3N4	fio	Forest	500	1	2
N3N4	fio	Forest	500	1	4.5
N3N4	fio	Forest	500	1	2
N3N4	zorzal	Forest	500	1	5.2
N3N4	paloma	Forest	500	1	8.5
N7N8	fio	Forest	500	1	2
N7N8	fio	Forest	500	1	6.9
N7N8	fio	Forest	500	3	6.9
N5N6	zorzal	Forest	500	1	8.5
N5N6	fio	Forest	500	1	1.1
N5N6	fio	Forest	500	1	5.7
N5N6	fio	Forest	500	1	1.5
N5N6	fio	Forest	500	1	2.6
S3S4	fio	Shrubland	500	1	8.5
S3S4	cachaña	Shrubland	500	2	2
S3S4	paloma	Shrubland	500	1	6.1
S3S4	zorzal	Shrubland	500	1	2
S3S4	fio	Shrubland	500	2	10
S3S4	fio	Shrubland	500	1	2
S3S4	fio	Shrubland	500	3	0
S3S4	cabecitanegra	Shrubland	500	2	4
S3S4	cabecitanegra	Shrubland	500	5	0
S3S4	fio	Shrubland	500	1	15
S3S4	comesebo	Shrubland	500	1	1
S3S4	chingolo	Shrubland	500	1	1
S3S4	fio	Shrubland	500	3	15
S3S4	chingolo	Shrubland	500	2	13
S3S4	comesebo	Shrubland	500	3	6
S3S4	paloma	Shrubland	500	1	6.8
S3S4	paloma	Shrubland	500	1	17.2
S3S4	fio	Shrubland	500	5	0
S3S4	comesebo	Shrubland	500	3	14.1
S3S4	comesebo	Shrubland	500	1	6
S3S4	paloma	Shrubland	500	1	6.5
S3S4	comesebo	Shrubland	500	2	7.7
S3S4	cabecitanegra	Shrubland	500	1	2.3
S3S4	fio	Shrubland	500	4	10
S3S4	faisan	Shrubland	500	1	0
S3S4	fio	Shrubland	500	2	20
S3S4	fio	Shrubland	500	3	23.5
S3S4	paloma	Shrubland	500	1	14.1
S3S4	fio	Shrubland	500	1	15
S3S4	fio	Shrubland	500	1	0
S3S4	fio	Shrubland	500	2	15
S3S4	cabecitanegra	Shrubland	500	1	7
S5S6	fio	Shrubland	500	1	5.7
S5S6	fio	Shrubland	500	1	2.5
S5S6	chingolo	Shrubland	500	1	8
S5S6	peutren	Shrubland	500	1	17.7
S5S6	fio	Shrubland	500	3	12.9
S5S6	jabali	Shrubland	500	1	5
S5S6	fio	Shrubland	500	2	3.1
S5S6	fio	Shrubland	500	1	20
S5S6	fio	Shrubland	500	1	5.7
S5S6	jabali	Shrubland	500	2	40
S5S6	ciervo	Shrubland	500	1	0
S5S6	fio	Shrubland	500	4	15
S5S6	comesebo	Shrubland	500	1	7.7
S5S6	fio	Shrubland	500	1	3
S5S6	fio	Shrubland	500	2	3.8
S5S6	fio	Shrubland	500	2	7.7
S5S6	fio	Shrubland	500	3	4
S5S6	zorzal	Shrubland	500	1	1.3
S5S6	comesebo	Shrubland	500	2	1
S5S6	fio	Shrubland	500	5	1.8
S5S6	zorzal	Shrubland	500	1	0.9
S5S6	fio	Shrubland	500	4	7.1
S5S6	faisan	Shrubland	500	2	0
S5S6	fio	Shrubland	500	3	10
S5S6	pitio	Shrubland	500	1	7
S5S6	fio	Shrubland	500	2	29.5
S5S6	peutren	Shrubland	500	1	5.1
S5S6	faisan	Shrubland	500	1	18.8
S5S6	cabecitanegra	Shrubland	500	2	0
S5S6	paloma	Shrubland	500	1	12.5
S5S6	pitio	Shrubland	500	1	12
S5S6	fio	Shrubland	500	2	0
S5S6	ciervo	Shrubland	500	1	35
S5S6	fio	Shrubland	500	1	14.1
S7S8	comesebo	Forest	500	1	6.9
S7S8	fio	Forest	500	3	0
S7S8	fio	Forest	500	1	6.6
S7S8	fio	Forest	500	1	13
S7S8	zorzal	Forest	500	1	1.6
S7S8	comesebo	Forest	500	1	0
S7S8	fio	Forest	500	2	1.2
S7S8	fio	Forest	500	1	6.6
S7S8	tordo	Forest	500	1	4
S7S8	fio	Forest	500	2	0
S7S8	fio	Forest	500	1	4.9
S7S8	zorzal	Forest	500	1	1.7
S7S8	fio	Forest	500	3	7.5
S7S8	fio	Forest	500	2	2.2
S7S8	chingolo	Forest	500	1	2.7
S7S8	chingolo	Forest	500	1	3
S7S8	paloma	Forest	500	1	3.5
S7S8	chingolo	Forest	500	2	4.9
S7S8	chucao	Forest	500	1	7.5
S7S8	fio	Forest	500	1	3.4
S7S8	chingolo	Forest	500	1	2.6
S7S8	fio	Forest	500	1	25
S7S8	fio	Forest	500	1	20
S7S8	pitio	Forest	500	2	13
P3P4	fio	Plantation	500	1	19.7
P3P4	faisan	Plantation	500	4	0
S1S2	chucao	Shrubland	500	1	8.7
S1S2	fio	Shrubland	500	2	2.7
S1S2	fio	Shrubland	500	2	15
S1S2	ciervo	Shrubland	500	1	25
S1S2	zorzal	Shrubland	500	1	0
S1S2	fio	Shrubland	500	1	10
S1S2	chingolo	Shrubland	500	1	4
S1S2	chingolo	Shrubland	500	2	10
S1S2	cabecitanegra	Shrubland	500	2	10
S1S2	fio	Shrubland	500	2	6
S1S2	faisan	Shrubland	500	1	100
S1S2	comesebo	Shrubland	500	1	2
S1S2	fio	Shrubland	500	1	0
S1S2	fio	Shrubland	500	1	0
S1S2	zorzal	Shrubland	500	1	8
P1P2	fio	Plantation	500	1	1
P1P2	faisan	Plantation	500	4	14.3
P1P2	faisan	Plantation	500	4	3
S3S4	comesebo	Shrubland	500	3	15
S3S4	zorzal	Shrubland	500	1	6
S3S4	zorzal	Shrubland	500	1	10.6
S3S4	comesebo	Shrubland	500	1	5
S5S6	zorzal	Shrubland	500	1	10
S5S6	ciervo	Shrubland	500	1	53.6
S5S6	zorzal	Shrubland	500	2	20
S7S8	jabali	Forest	500	1	5
N1N2	zorzal	Forest	500	1	0
N1N2	zorzal	Forest	500	1	2
N1N2	ciervo	Forest	500	1	40
antepuerto	ciervo	Forest	500	1	25
antepuerto	ciervo	Forest	500	1	0
N3N4	none	Forest	500	NA	NA
P1P2	fio	Plantation	500	1	23
P1P2	fio	Plantation	500	1	20
P1P2	faisan	Plantation	500	2	10
P1P2	fio	Plantation	500	1	8.7
P1P2	fio	Plantation	500	1	20
P1P2	ciervo	Plantation	500	1	7.7
P1P2	fio	Plantation	500	1	17.1
P1P2	fio	Plantation	500	1	15.3
P1P2	fio	Plantation	500	1	8.6
P1P2	fio	Plantation	500	1	53.6
P1P2	faisan	Plantation	500	2	70
P1P2	fio	Plantation	500	1	17.3
P1P2	fio	Plantation	500	1	60
P1P2	faisan	Plantation	500	2	37.6
P1P2	fio	Plantation	500	2	19.3
P1P2	fio	Plantation	500	2	8.7
P1P2	chucao	Plantation	500	1	56.6
P1P2	fio	Plantation	500	3	12.7
P1P2	fio	Plantation	500	1	24.7
P1P2	fio	Plantation	500	1	30.6
P1P2	fio	Plantation	500	1	6.1
P1P2	chucao	Plantation	500	1	60
P1P2	fio	Plantation	500	2	16.1
P1P2	fio	Plantation	500	2	1.7
S3S4	fio	Shrubland	500	1	14.8
S3S4	fio	Shrubland	500	1	6.9
S3S4	zorzal	Shrubland	500	1	2.7
S3S4	fio	Shrubland	500	1	7.1
S3S4	fio	Shrubland	500	1	5.1
S3S4	fio	Shrubland	500	1	3
S3S4	fio	Shrubland	500	2	10
S3S4	fio	Shrubland	500	1	2.6
S3S4	fio	Shrubland	500	1	15
S3S4	fio	Shrubland	500	2	1
S3S4	fio	Shrubland	500	1	1
S3S4	chucao	Shrubland	500	1	14.3
S3S4	fio	Shrubland	500	3	10.3
S3S4	faisan	Shrubland	500	2	0
S3S4	fio	Shrubland	500	1	9.2
S3S4	faisan	Shrubland	500	4	25
S3S4	fio	Shrubland	500	1	9.8
S3S4	fio	Shrubland	500	1	12
S3S4	fio	Shrubland	500	2	2.2
S3S4	fio	Shrubland	500	1	4.6
S3S4	fio	Shrubland	500	1	4
S3S4	fio	Shrubland	500	1	10
S3S4	fio	Shrubland	500	1	14.1
S3S4	paloma	Shrubland	500	1	8
S3S4	fio	Shrubland	500	1	7
S3S4	fio	Shrubland	500	1	13
S3S4	fio	Shrubland	500	2	12.1
S3S4	fio	Shrubland	500	1	2
S3S4	chucao	Shrubland	500	1	8.6
S3S4	fio	Shrubland	500	1	5
S3S4	fio	Shrubland	500	1	7.2
S3S4	fio	Shrubland	500	1	0
S3S4	fio	Shrubland	500	1	3.9
S3S4	zorzal	Shrubland	500	2	3.9
S3S4	fio	Shrubland	500	1	7.4
S3S4	fio	Shrubland	500	1	0
S3S4	fio	Shrubland	500	1	6
S3S4	zorzal	Shrubland	500	1	10
S3S4	fio	Shrubland	500	1	15
S3S4	fio	Shrubland	500	1	8
S3S4	fio	Shrubland	500	2	16.9
S3S4	chucao	Shrubland	500	1	6.5
S3S4	fio	Shrubland	500	2	0
S3S4	fio	Shrubland	500	1	9
S3S4	paloma	Shrubland	500	4	6.8
S3S4	fio	Shrubland	500	2	15
S3S4	fio	Shrubland	500	3	4.4
S3S4	chucao	Shrubland	500	2	5
S3S4	fio	Shrubland	500	1	9.6
S3S4	fio	Shrubland	500	1	0
S3S4	fio	Shrubland	500	1	3.8
S3S4	fio	Shrubland	500	2	9.8
S3S4	fio	Shrubland	500	2	6
S3S4	fio	Shrubland	500	1	0
S3S4	fio	Shrubland	500	4	1.7
S3S4	fio	Shrubland	500	2	6.4
S3S4	fio	Shrubland	500	3	10
S3S4	fio	Shrubland	500	2	6.1
S3S4	fio	Shrubland	500	1	4.6
S3S4	fio	Shrubland	500	4	1.7
S3S4	paloma	Shrubland	500	1	0
S3S4	chucao	Shrubland	500	1	12.7
S3S4	fio	Shrubland	500	1	13
S3S4	paloma	Shrubland	500	6	5.2
S3S4	fio	Shrubland	500	2	8.5
S3S4	fio	Shrubland	500	1	0
S3S4	fio	Shrubland	500	3	3.4
S3S4	fio	Shrubland	500	3	13
S3S4	fio	Shrubland	500	2	2
S5S6	fio	Shrubland	500	3	10.8
S5S6	fio	Shrubland	500	2	10
S5S6	fio	Shrubland	500	2	4
S5S6	fio	Shrubland	500	3	5.7
S5S6	fio	Shrubland	500	2	2.7
S5S6	fio	Shrubland	500	2	4
S5S6	zorzal	Shrubland	500	1	7
S5S6	fio	Shrubland	500	1	10
S5S6	fio	Shrubland	500	1	5.1
S5S6	faisan	Shrubland	500	1	19.7
S5S6	fio	Shrubland	500	2	5
S5S6	fio	Shrubland	500	2	3.2
S5S6	fio	Shrubland	500	2	13.9
S5S6	zorzal	Shrubland	500	1	13.9
S5S6	fio	Shrubland	500	1	8
S5S6	fio	Shrubland	500	1	12
S5S6	fio	Shrubland	500	1	0
S5S6	fio	Shrubland	500	1	10
S5S6	fio	Shrubland	500	1	0
S5S6	fio	Shrubland	500	1	10.4
S5S6	fio	Shrubland	500	5	5
S5S6	fio	Shrubland	500	1	0
S5S6	fio	Shrubland	500	1	3
S5S6	fio	Shrubland	500	1	3.9
S5S6	zorzal	Shrubland	500	1	2.8
S5S6	fio	Shrubland	500	3	11
S5S6	fio	Shrubland	500	2	10
S5S6	fio	Shrubland	500	2	9.6
S5S6	fio	Shrubland	500	1	2
S5S6	fio	Shrubland	500	2	10
S5S6	fio	Shrubland	500	1	7
S5S6	fio	Shrubland	500	1	4.8
S5S6	paloma	Shrubland	500	1	1.3
S5S6	fio	Shrubland	500	1	4
S5S6	fio	Shrubland	500	4	8.5
S5S6	fio	Shrubland	500	2	8.6
S5S6	zorzal	Shrubland	500	2	10
S5S6	fio	Shrubland	500	3	15
S5S6	fio	Shrubland	500	2	14.1
S5S6	fio	Shrubland	500	3	3.5
S5S6	fio	Shrubland	500	2	1.5
S5S6	fio	Shrubland	500	4	4
S5S6	fio	Shrubland	500	5	18
S5S6	fio	Shrubland	500	3	12.1
S5S6	fio	Shrubland	500	2	20
S5S6	fio	Shrubland	500	3	10.9
S5S6	fio	Shrubland	500	2	30
S5S6	fio	Shrubland	500	1	17
S5S6	fio	Shrubland	500	3	12.9
S5S6	fio	Shrubland	500	2	15.8
S1S2	fio	Shrubland	500	1	0
S1S2	fio	Shrubland	500	1	11.5
S1S2	fio	Shrubland	500	2	4.5
S1S2	chingolo	Shrubland	500	3	5
S1S2	comesebo	Shrubland	500	2	5
S1S2	coludito	Shrubland	500	1	0
S1S2	fio	Shrubland	500	2	2
S1S2	fio	Shrubland	500	1	2
S1S2	comesebo	Shrubland	500	2	4
S1S2	fio	Shrubland	500	2	2.3
S1S2	fio	Shrubland	500	1	0
S1S2	fio	Shrubland	500	8	3.5
S1S2	fio	Shrubland	500	1	1.5
S1S2	faisan	Shrubland	500	3	40
S1S2	fio	Shrubland	500	2	0
S1S2	jabali	Shrubland	500	1	8
S1S2	fio	Shrubland	500	1	0
S1S2	fio	Shrubland	500	1	0
S1S2	zorzal	Shrubland	500	2	9.2
S1S2	fio	Shrubland	500	2	0
S1S2	fio	Shrubland	500	1	7.8
S1S2	fio	Shrubland	500	1	0
S1S2	fio	Shrubland	500	3	0
S1S2	diuca	Shrubland	500	2	4.4
S1S2	ciervo	Shrubland	500	2	23
S1S2	faisan	Shrubland	500	2	40
S1S2	zorzal	Shrubland	500	1	22
S1S2	fio	Shrubland	500	2	22
S1S2	carpinterog	Shrubland	500	1	35
S1S2	fio	Shrubland	500	3	3
S1S2	fio	Shrubland	500	1	9
S1S2	chucao	Shrubland	500	1	15
S1S2	faisan	Shrubland	500	1	0
S1S2	fio	Shrubland	500	1	20
S1S2	fio	Shrubland	500	2	4
S1S2	fio	Shrubland	500	2	4
S1S2	fio	Shrubland	500	1	0
S1S2	fio	Shrubland	500	3	7.1
S1S2	fio	Shrubland	500	2	8
P3P4	fio	Plantation	500	1	5.1
P3P4	fio	Plantation	500	2	18
S7S8	fio	Forest	500	1	0
S7S8	fio	Forest	500	1	0
S7S8	fio	Forest	500	3	14.8
S7S8	fio	Forest	500	1	11.3
S7S8	paloma	Forest	500	1	11
S7S8	paloma	Forest	500	1	11.6
S7S8	fio	Forest	500	3	14.1
S7S8	fio	Forest	500	1	6.8
S7S8	coludito	Forest	500	1	0
S7S8	chucao	Forest	500	1	20.5
S7S8	fio	Forest	500	1	4
S7S8	jabali	Forest	500	1	4.6
S7S8	pitio	Forest	500	1	15.6
S7S8	diucon	Forest	500	1	9
S7S8	fio	Forest	500	2	15
S7S8	comesebo	Forest	500	2	9
S7S8	fio	Forest	500	1	0
S7S8	chucao	Forest	500	2	17.3
S7S8	fio	Forest	500	1	7
S7S8	fio	Forest	500	1	0
S7S8	fio	Forest	500	4	25
S7S8	fio	Forest	500	1	16
S7S8	fio	Forest	500	1	3
S7S8	comesebo	Forest	500	3	3.5
S7S8	fio	Forest	500	2	3.5
S7S8	zorzal	Forest	500	2	2
S7S8	fio	Forest	500	6	0
S7S8	comesebo	Forest	500	2	5.1
S7S8	zorzal	Forest	500	1	7
S7S8	chucao	Forest	500	1	30
S7S8	fio	Forest	500	1	7.1
S7S8	fio	Forest	500	1	8
S7S8	comesebo	Forest	500	1	1
S7S8	fio	Forest	500	1	0
S7S8	chucao	Forest	500	1	5
S7S8	fio	Forest	500	4	3
S7S8	chingolo	Forest	500	2	2.5
S7S8	comesebo	Forest	500	4	1.6
S7S8	fio	Forest	500	2	23
S7S8	fio	Forest	500	1	7
S7S8	jabali	Forest	500	1	0
S7S8	fio	Forest	500	1	3
S7S8	paloma	Forest	500	1	17
N1N2	chucao	Forest	500	1	1.9
N1N2	pitio	Forest	500	1	2.6
N1N2	fio	Forest	500	1	20
N1N2	fio	Forest	500	1	15
N1N2	fio	Forest	500	3	7.8
N1N2	chingolo	Forest	500	1	20
N1N2	fio	Forest	500	2	1.3
N1N2	fio	Forest	500	2	14.3
N1N2	comesebo	Forest	500	1	20
N1N2	comesebo	Forest	500	3	7
N1N2	fio	Forest	500	3	12.3
N1N2	zorzal	Forest	500	1	2
N1N2	fio	Forest	500	2	9.9
N1N2	fio	Forest	500	1	11.3
N1N2	fio	Forest	500	1	12.9
N1N2	fio	Forest	500	2	17
N1N2	fio	Forest	500	1	5.7
N1N2	pitio	Forest	500	1	25
N1N2	zorzal	Forest	500	1	15
N1N2	fio	Forest	500	2	18
N1N2	chucao	Forest	500	1	1.1
N1N2	fio	Forest	500	1	15
N1N2	comesebo	Forest	500	1	13.9
N1N2	zorzal	Forest	500	1	9.8
N1N2	paloma	Forest	500	1	0
N1N2	zorzal	Forest	500	1	6.9
N3N4	comesebo	Forest	500	1	20
N3N4	fio	Forest	500	2	3.5
N3N4	chucao	Forest	500	1	14.7
N3N4	zorzal	Forest	500	1	15
N3N4	fio	Forest	500	3	7.1
N3N4	fio	Forest	500	2	19
N3N4	fio	Forest	500	2	17
N3N4	fio	Forest	500	3	20
N3N4	fio	Forest	500	2	13
N3N4	fio	Forest	500	1	20
N3N4	fio	Forest	500	1	2.3
N3N4	fio	Forest	500	2	0
N7N8	fio	Forest	500	1	2.3
N7N8	chucao	Forest	500	1	8.6
N7N8	fio	Forest	500	1	15.3
N7N8	fio	Forest	500	1	0
N7N8	chucao	Forest	500	1	8
N7N8	fio	Forest	500	1	18.8
N7N8	chucao	Forest	500	1	15
N7N8	chucao	Forest	500	1	5
N5N6	chucao	Forest	500	1	20
N5N6	chucao	Forest	500	1	12
N5N6	comesebo	Forest	500	1	2.9
N5N6	comesebo	Forest	500	1	7.1
N5N6	comesebo	Forest	500	1	3.1
N5N6	comesebo	Forest	500	2	7.1
N5N6	comesebo	Forest	500	1	14.8
N5N6	chucao	Forest	500	1	5
N5N6	comesebo	Forest	500	2	7.7
N5N6	zorzal	Forest	500	2	6.2
N5N6	comesebo	Forest	500	2	13
N5N6	chucao	Forest	500	1	6
N5N6	pitio	Forest	500	1	15.3
N5N6	comesebo	Forest	500	2	1.7
N5N6	fio	Forest	500	1	13.9
N5N6	comesebo	Forest	500	3	0
N5N6	chucao	Forest	500	1	12
N5N6	zorzal	Forest	500	1	12.3
N5N6	comesebo	Forest	500	2	20
N7N8	chucao	Forest	500	1	4
N7N8	comesebo	Forest	500	1	11
N7N8	chucao	Forest	500	1	1
N7N8	fio	Forest	500	1	4
N7N8	chucao	Forest	500	1	2
N7N8	zorzal	Forest	500	1	2
N7N8	comesebo	Forest	500	1	10.3
N7N8	chucao	Forest	500	1	5.7
N7N8	faisan	Forest	500	2	0
N7N8	fio	Forest	500	3	10
N1N2	comesebo	Forest	500	1	7.1
N1N2	peutren	Forest	500	1	11.5
N1N2	comesebo	Forest	500	3	12
N1N2	zorzal	Forest	500	1	0
N1N2	chingolo	Forest	500	2	10.6
N1N2	comesebo	Forest	500	3	9
N1N2	comesebo	Forest	500	4	0
N1N2	comesebo	Forest	500	4	5
N1N2	diucon	Forest	500	1	8
N1N2	zorzal	Forest	500	2	6.4
N1N2	comesebo	Forest	500	5	0
N1N2	faisan	Forest	500	2	1
N1N2	chucao	Forest	500	1	2
N1N2	comesebo	Forest	500	3	13
N1N2	peutren	Forest	500	1	5.6
N1N2	peutren	Forest	500	1	18.8
N3N4	comesebo	Forest	500	1	2
N3N4	peutren	Forest	500	1	19
N3N4	peutren	Forest	500	2	18.8
N3N4	chucao	Forest	500	1	10
N3N4	comesebo	Forest	500	2	14.8
N3N4	peutren	Forest	500	2	14.1
N3N4	comesebo	Forest	500	3	13
N3N4	chucao	Forest	500	1	6
N3N4	fio	Forest	500	1	20
N3N4	peutren	Forest	500	1	4.1
N3N4	ciervo	Forest	500	1	13.1
N3N4	cabecitanegra	Forest	500	10	8
N3N4	comesebo	Forest	500	4	2.8
N5N6	comesebo	Forest	500	3	8.4
N5N6	zorzal	Forest	500	1	17.3
N5N6	chucao	Forest	500	1	3
N5N6	chucao	Forest	500	1	6
N5N6	comesebo	Forest	500	3	11.3
N5N6	peutren	Forest	500	1	16.7
N5N6	comesebo	Forest	500	2	8
N5N6	comesebo	Forest	500	3	10
N5N6	peutren	Forest	500	1	18.8
N5N6	chucao	Forest	500	1	8.9
N5N6	peutren	Forest	500	1	13
N5N6	peutren	Forest	500	1	15
N5N6	comesebo	Forest	500	1	0
N5N6	zorzal	Forest	500	2	3.5
N5N6	paloma	Forest	500	1	13.9
N5N6	zorzal	Forest	500	1	4.1
N5N6	jabali	Forest	500	1	7
